# Supplementary material for: Comparison of the clinical usefulness of CXCL-8 and common clinical tumor markers for esophageal cancer diagnosis
Source: PeerJ journal article supplement (doi:10.7717/peerj.20079), 2025-10-28
Supplement: raw_data_2.xlsx [file raw_data_2.xlsx]

## Sheet: control group
HD	Age	Gender	CYFRA211	CEA	CA199	SCC	CXCL8	CXCL8
1	61	1	2.36	1.9	10.35	0.7	23.61	20.6479
2	71	1	2.04	1.6	10.23	0.8	20.81	20.81
3	62	1	1.62	2	6.35	0.6	23.64	23.6165
4	59	1	1.07	1.4	0.6	0.5	21	22.6018
5	52	1	2.33	1.9	6.61	0.6	20.0218	20.0218
6	54	1	2.65	0.8	14.82	1	22.6	21.2183
7	63	1	1.25	1.3	5.78	0.8	23.96	21.8021
8	60	1	2.91	0.9	12.16	0.5	22.1801	22.1801
9	52	1	3.24	1.3	6.76	0.6	21.8	23.9721
10	66	0	1.39	1.6	5.32	0.7	21.97	21.9571
11	59	0	2.37	0.5	7.77	0.9	22.8	20.0772
12	70	1	2.63	2	5.08	0.6	22.7409	22.7409
13	66	0	2.06	1.6	4.03	0.7	20.08	22.7986
14	69	1	1.89	1.7	11.28	0.8	21.44	23.6723
15	79	0	1.99	1.8	8.43	0.5	22.7737	22.7737
16	67	0	1.22	1.4	5.95	1.2	21.7916	21.7916
17	64	0	1.81	2.7	16.4	0.9	23.67	21.4448
18	37	0	1.69	2.1	7.17	1.1	20.8131	20.8131
19	62	1	2.71	1.1	0.6	0.6	22.29	21.6639
20	59	0	1.18	4	27.3	0.7	21.8301	21.8301
21	59	0	2.16	0.6	5.17	0.8	20.1827	20.1827
22	69	0	1.77	2.1	5.26	0.6	21.66	22.2943
23	62	1	1.93	1.7	8.14	0.5	20.35	21.7671
24	59	0	2.53	1.2	8.35	0.6	21.1818	21.1818
25	62	1	2.56	2.2	18.5	0.5	21.75	20.3482
26	68	0	2.74	2.2	17.52	0.6	20.7567	20.7567
27	59	0	1.52	1	5.12	0.5	20.2195	20.2195
28	75	1	0.66	1	0.6	0.4	19.76	22.2028
29	49	1	3.25	0.7	0.6	1.1	19.7874	19.7874
30	60	0	0.66	1	4.74	1.3	21.2923	21.2923
31	55	1	2.93	1.2	15.36	0.5	22.19	19.7535
32	76	1	3.12	1.5	12.8	0.6	21.894	21.894
33	75	1	1.77	1.7	8.46	0.5	21.11	21.11
34	55	0	1.12	0.8	10.4	0.4	21.3869	21.3869
35	60	0	3.3	0.6	8.04	0.6	20.19	19.7452
36	38	1	1.29	1	5.28	0.7	20.1949	20.1949
37	71	0	3.41	1	7.47	0.8	20.1949	20.1949
38	71	1	1.02	2.6	32.56	1	19.75	20.1349
39	64	1	2.03	1.2	10.29	0.8	19.7535	19.7535
40	73	1	2.39	2.3	9.3	0.6	20.3217	20.3217
41	68	1	3.05	1.4	7.73	0.8	20.87	20.87
42	79	1	2.88	0.9	5.86	0.6	20.32	20.4159
43	68	1	3.16	4	19.61	0.7	20.54	22.1351
44	69	0	1.16	2.3	3.9	0.6	21.5219	21.5219
45	52	0	2.95	4.2	18.87	0.7	22.0683	22.0683
46	60	1	1.97	1.7	9.68	1.5	22.14	20.5435
47	65	0	2.32	4.7	21.64	0.3	22.29	22.7409
48	79	1	1.03	2.6	10.92	0.2	22.3349	22.3349
49	65	0	3.21	4.1	29.08	0.4	22.74	22.2956
50	87	1	2.67	2.8	9.23	0.5	23.0222	23.0222
51	68	1	1.51	2.2	12.82	0.3	22.3885	22.3885
52	62	1	2.52	2.6	9.65	0.9	22.5729	22.5729
53	65	1	2.16	0.7	0.6	0.7	22.232	22.232
54	55	1	2.01	1.7	6.23	0.8	20.9347	20.9347
55	69	1	2.23	1	8.33	1.1	21.6899	21.6899
56	61	0	2.21	3.2	7.24	1.1	23.9804	23.9804
57	66	1	2.45	2.6	13.78	1.2	22.375	22.375
58	76	1	1.89	1.9	17.52	0.5	22.1707	22.1707
59	59	1	1.26	3	12.82	0.6	22.066	22.066
60	52	1	2.01	3.2	2.22	0.5	22.3086	22.3086
61	57	1	1.32	1.5	4.39	0.7	21.8692	21.8692
62	61	1	2	2.7	15.17	0.8	21.7788	21.7788
63	53	1	2.05	2.3	5.62	0.6	23.2367	23.2367
64	54	1	2.42	2.7	11.48	0.3	22.4159	22.4159
65	57	1	1.51	2.4	0.6	0.6	21.7874	21.7874
66	51	0	1.56	2.4	6.54	0.5	22.375	22.375
67	54	1	2.22	1.8	0.98	0.3	22.1827	22.1827
68	54	1	1.36	2.3	7.26	1.2	22.4859	22.4859
69	54	0	1.69	1.7	6.52	0.7	22.1949	22.1949
70	56	0	1.71	3.1	0.6	0.8	23.7049	23.7049
71	67	0	3.23	2.6	8.35	0.3	22.0327	22.0327
72	59	0	1.83	3.3	13.24	1.2	22.5435	22.5435
73	60	0	2.55	2.1	19.41	1.4	22.1587	22.1587
74	64	0	2.35	1.6	3.63	1	22.6026	22.6026
75	55	1	1.39	3.9	35.09	0.8	22.5582	22.5582
